# Supplementary material
Source: PubMed Central journal article supplement (PMC3646987)
Supplement: NIHMS457007-supplement-1.pdf [file NIHMS457007-supplement-1.pdf]

Supplemental Figure 1

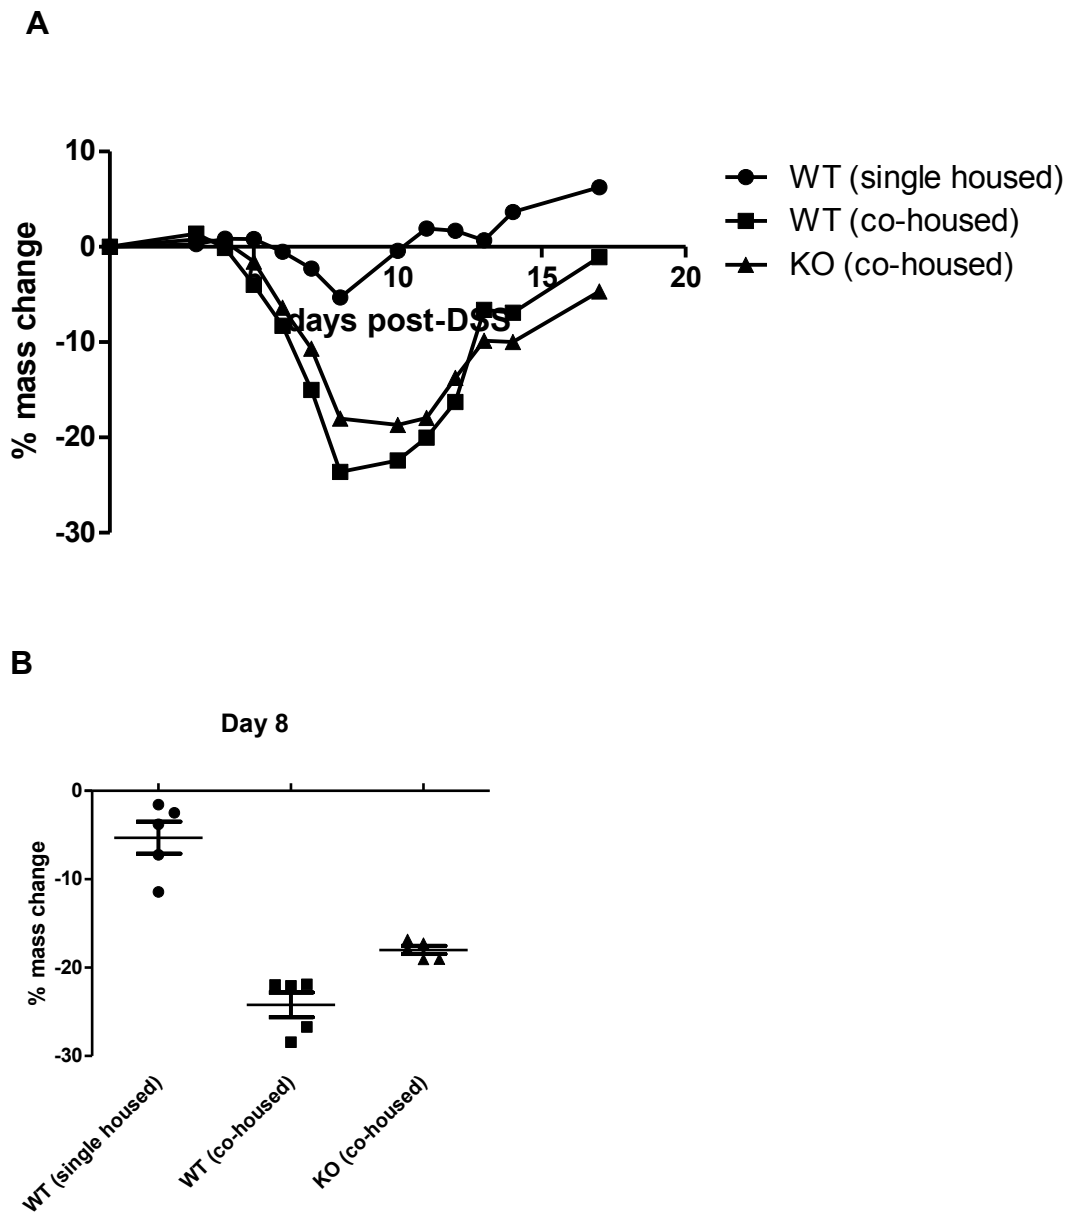

**Supplemental Figure 1 Co-housing wild-type mice with re-derived *Il22*<sup>-/-</sup> mice results in exacerbated colitis.** C57BL/6 mice were either housed by themselves, or co-housed with red-derived *Il22*<sup>-/-</sup> mice for four weeks. Mice were then given 2% DSS in their drinking water for seven days. (A) Mice were massed daily. Shown is mean change in mass for each group over time. (B) Mass loss at day 8 post-DSS. Each dot presents one mouse, line indicates mean. Experiment is representative of two independent experiments.
